# Supplementary material
Source: PubMed Central journal article supplement (PMC7184292)
Supplement: NIHMS1577319-supplement-Blot_Ext_Figure_5.pdf [file NIHMS1577319-supplement-Blot_Ext_Figure_5.pdf]

Extended Data Fig. 5a

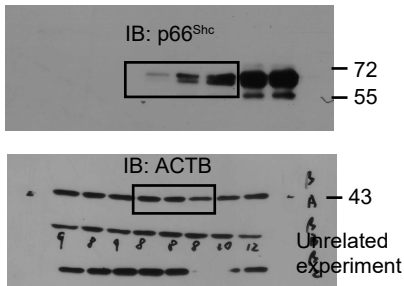

Extended Data Fig. 5b

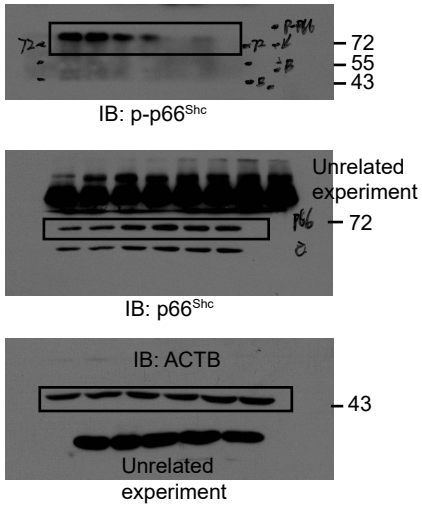

Extended Data Fig. 5d

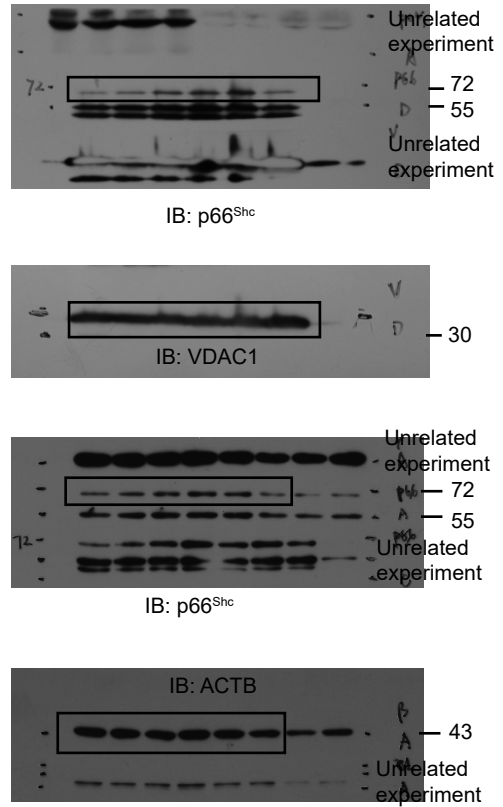

Extended Data Fig. 5f

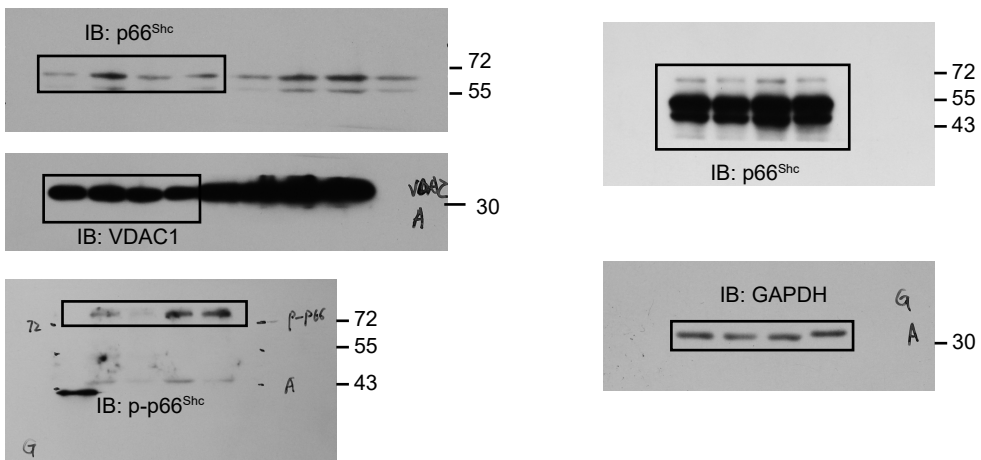

Extended Data Fig. 5i

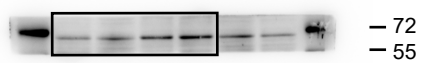

IB: p66<sup>Shc</sup>

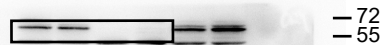

IB: CRY1

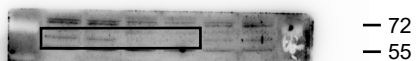

IB: CRY2

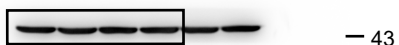

IB: ACTB

Extended Data Fig. 5l

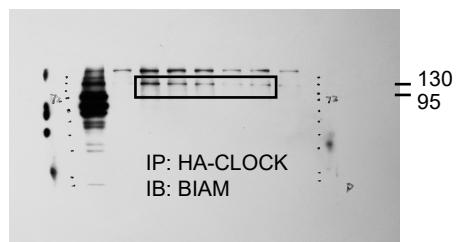

IP: HA-CLOCK  
IB: BIAM

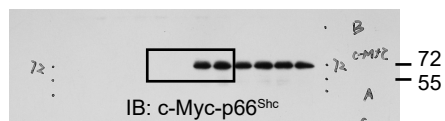

IB: c-Myc-p66<sup>Shc</sup>

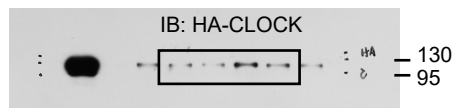

IB: HA-CLOCK

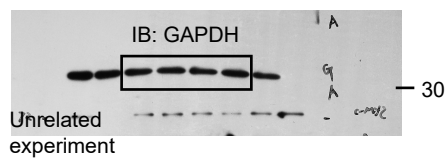

IB: GAPDH

Unrelated  
experiment

Extended Data Fig. 5m

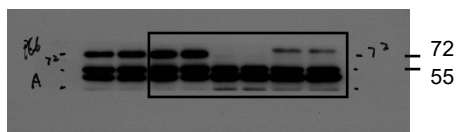

IB: p66<sup>Shc</sup>

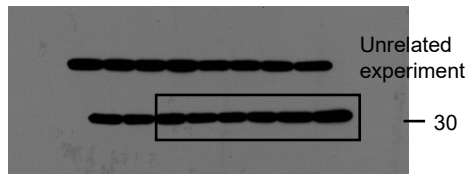

IB: GAPDH

Unrelated  
experiment
