# Supplementary material
Source: PubMed Central journal article supplement (PMC7184292)

Fig. 3d

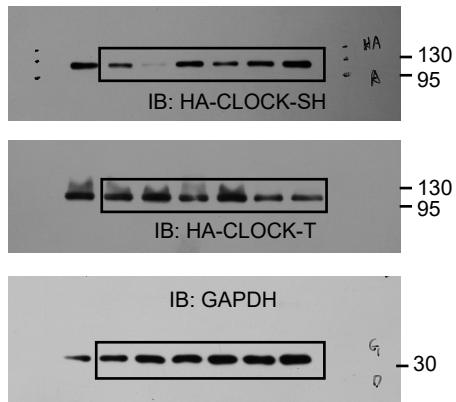

Fig. 3e

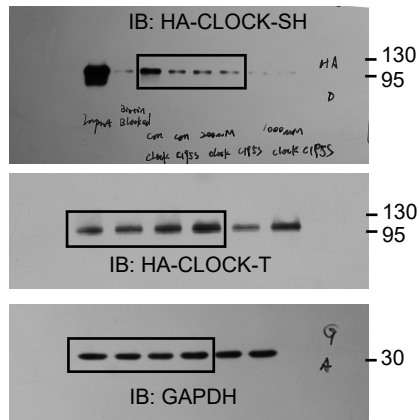

Fig. 3f

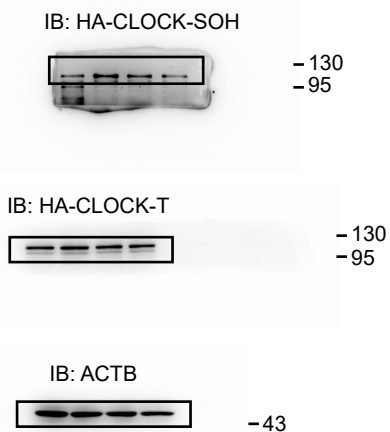

Fig. 3j

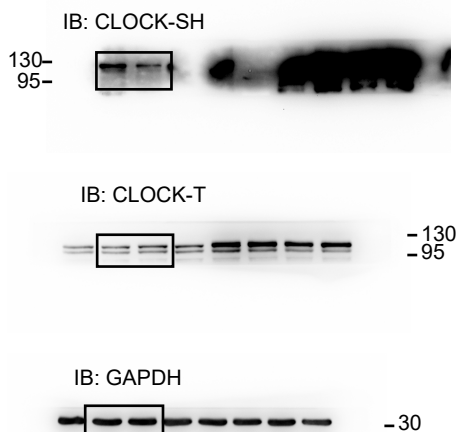

Fig. 3k

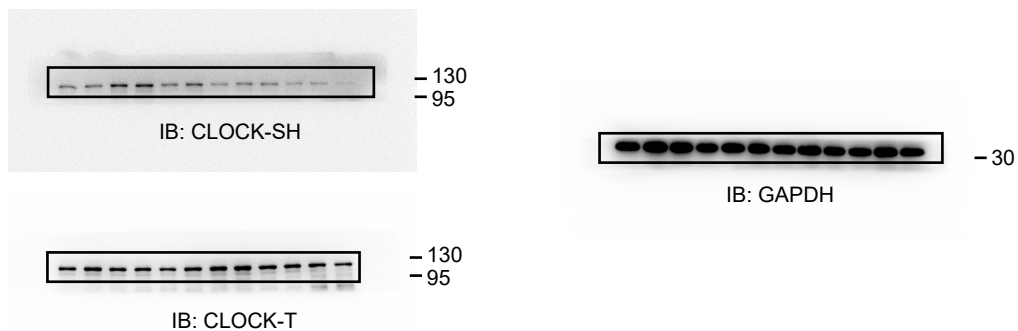

Supplement: NIHMS1577319-supplement-Blot_Figure_3.pdf [file NIHMS1577319-supplement-Blot_Figure_3.pdf]
